# Supplementary material for: Paquinimod prevents development of diabetes in the non-obese diabetic (NOD) mouse
Source: PubMed Central journal article supplement (PMC5942776; doi:10.1371/journal.pone.0196598), 2018-05-09
Supplement: pone.0196598.s001.pdf [file pone.0196598.s001.pdf]

**S1 Table.** Delayed onset and reduced incidence of diabetes in paquinimod-treated NOD mice

| Treatment w10 to w20 | n  | Onset (week) <sup>a</sup> | Incidence (%) | Survival (%) |
|----------------------|----|---------------------------|---------------|--------------|
| Ctrl                 | 20 | 23.8 ± 2.1                | 80            | 20           |
| 0.04 mg/kg/day       | 10 | 26.3 ± 2.9                | 80            | 20           |
| 0.2 mg/kg/day        | 10 | 27.4 ± 3.7                | 60            | 40           |
| 1 mg/kg/day          | 10 | 40.0 ± 0.0****            | 0***          | 100          |
| 5 mg/kg/day          | 10 | 37.5 ± 1.6***             | 30**          | 70           |

  

| Treatment w15 to w38 | n  | Onset (week) <sup>b</sup> | Incidence (%) | Survival (%) |
|----------------------|----|---------------------------|---------------|--------------|
| Ctrl                 | 15 | 23.3 ± 2.5                | 73.3          | 26.7         |
| 0.04 mg/kg/day       | 12 | 27.2 ± 2.9                | 58.3          | 41.7         |
| 0.2 mg/kg/day        | 12 | 26.5 ± 3.3                | 50            | 50           |
| 1 mg/kg/day          | 13 | 32.3 ± 2.6*               | 31**          | 69           |
| 5 mg/kg/day          | 10 | 32.4 ± 2.9*               | 30**          | 70           |
